# Supplementary material for: Genome-Wide Identification and Expression Analysis of TGA Family Genes Associated with Abiotic Stress in Sunflowers (Helianthus annuus L.)
Source: MDPI journal article supplement (doi:10.3390/ijms25074097), 2024-04-07
Supplement: s1 [file s1]

## Supplementary Figures and Tables

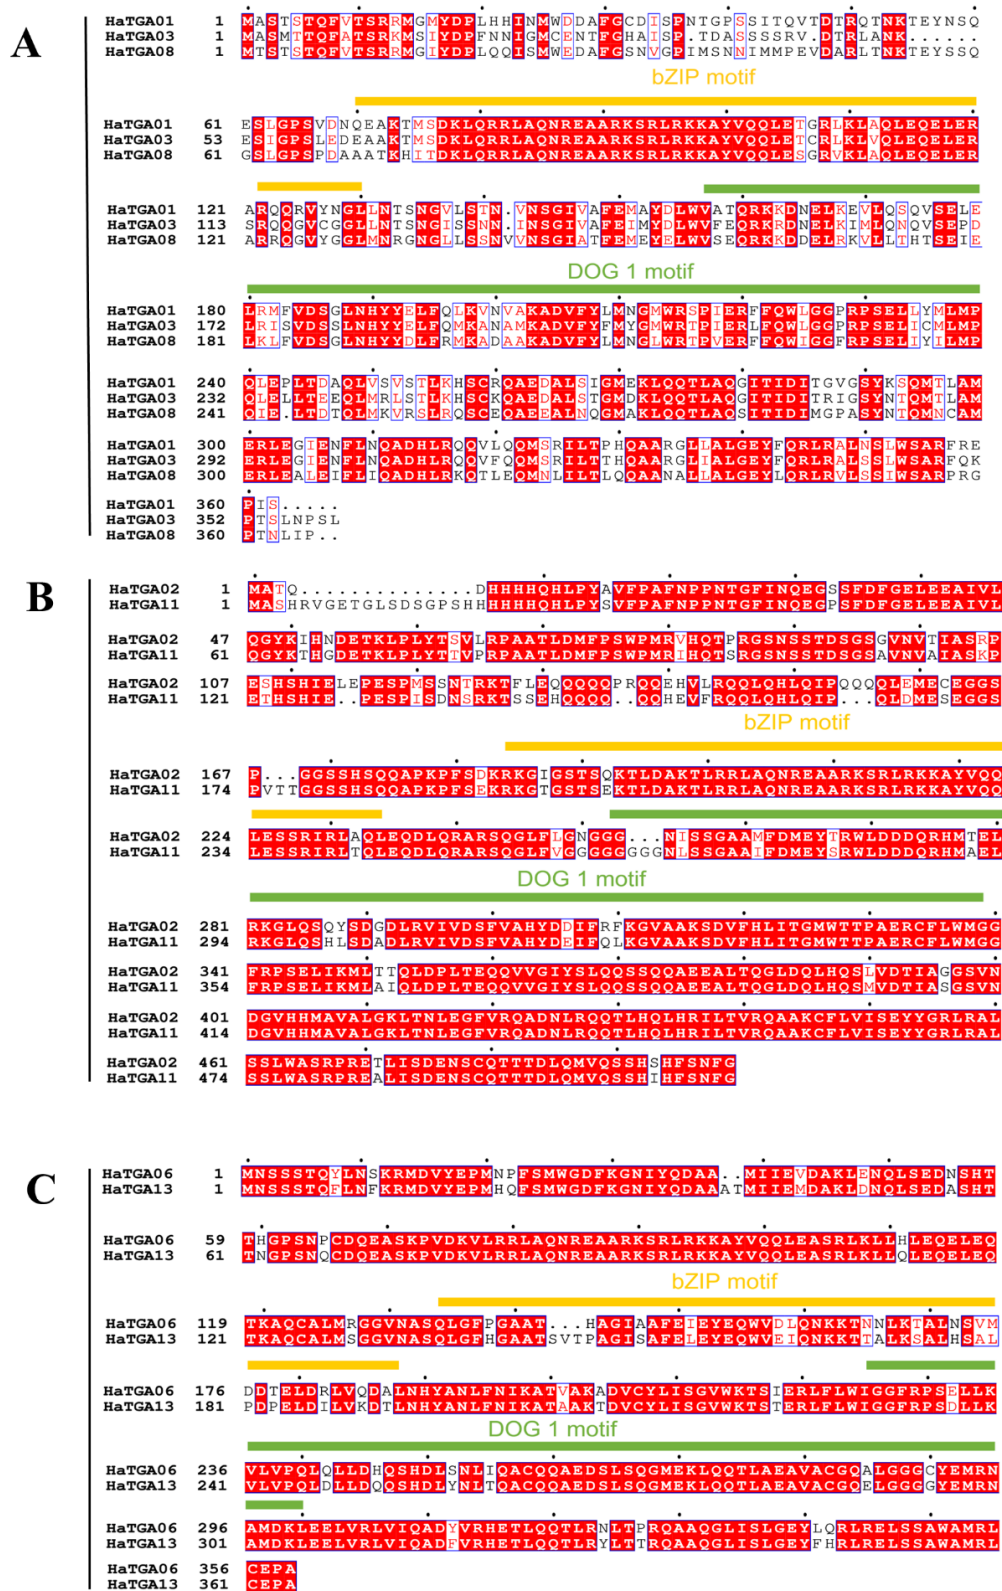

**Figure S1.** Protein sequence alignment analysis of closely related HaTGA. (A) Multiple sequence alignment of HaTGA01, HaTGA03, and HaTGA08, highlighting similarities and differences in their amino acid sequences. (B) Pairwise protein sequence alignment of HaTGA02 and HaTGA11 protein sequence. (C) Protein sequence conservation of HaTGA06 and HaTGA13. The protein sequence annotated by yellow and green lines indicated the presence of the bZIP and DOG1 domains, respectively.

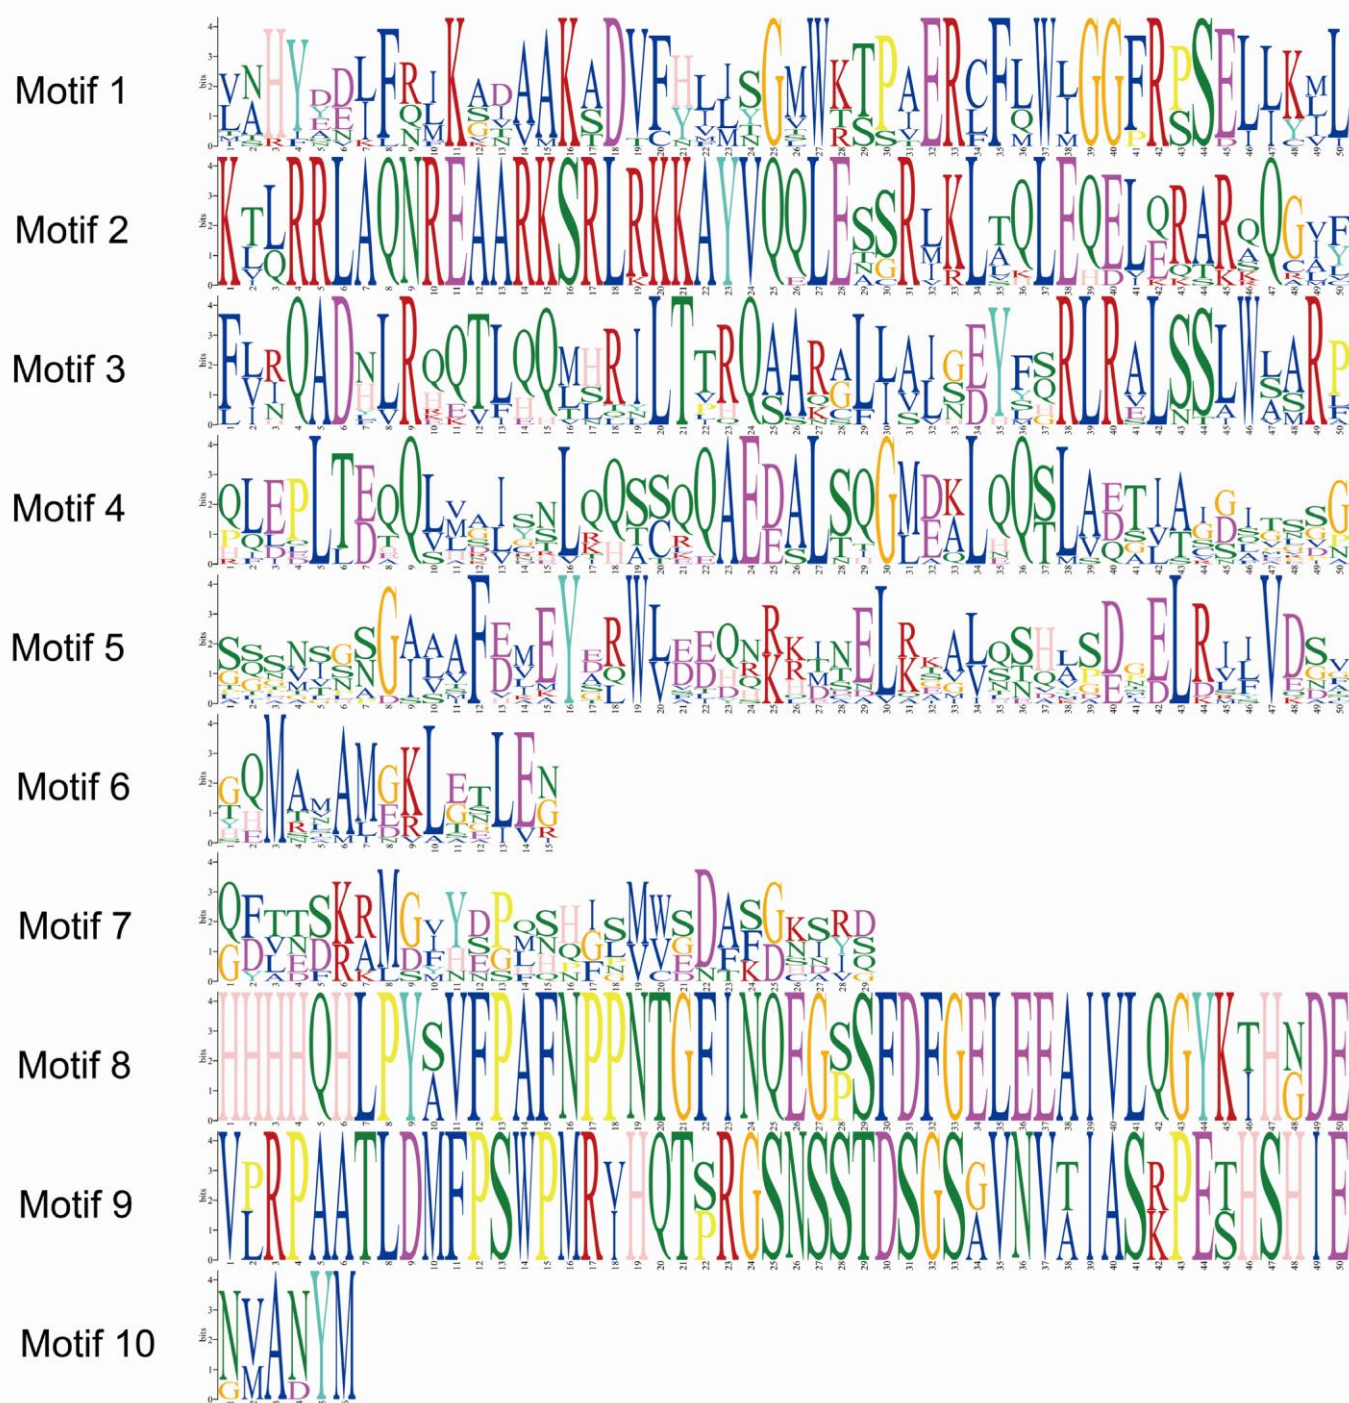

**Figure S2.** Visualization of conserved motifs within sunflower TGA proteins. Each logo consists of stacks of letters, with each letter representing an amino acid. The total height of the stacks at a specific position reflects the degree of conservation across the analyzed sequences. The height of an individual letter within the letter stacks indicates the relative frequency of the corresponding amino acid at that position.

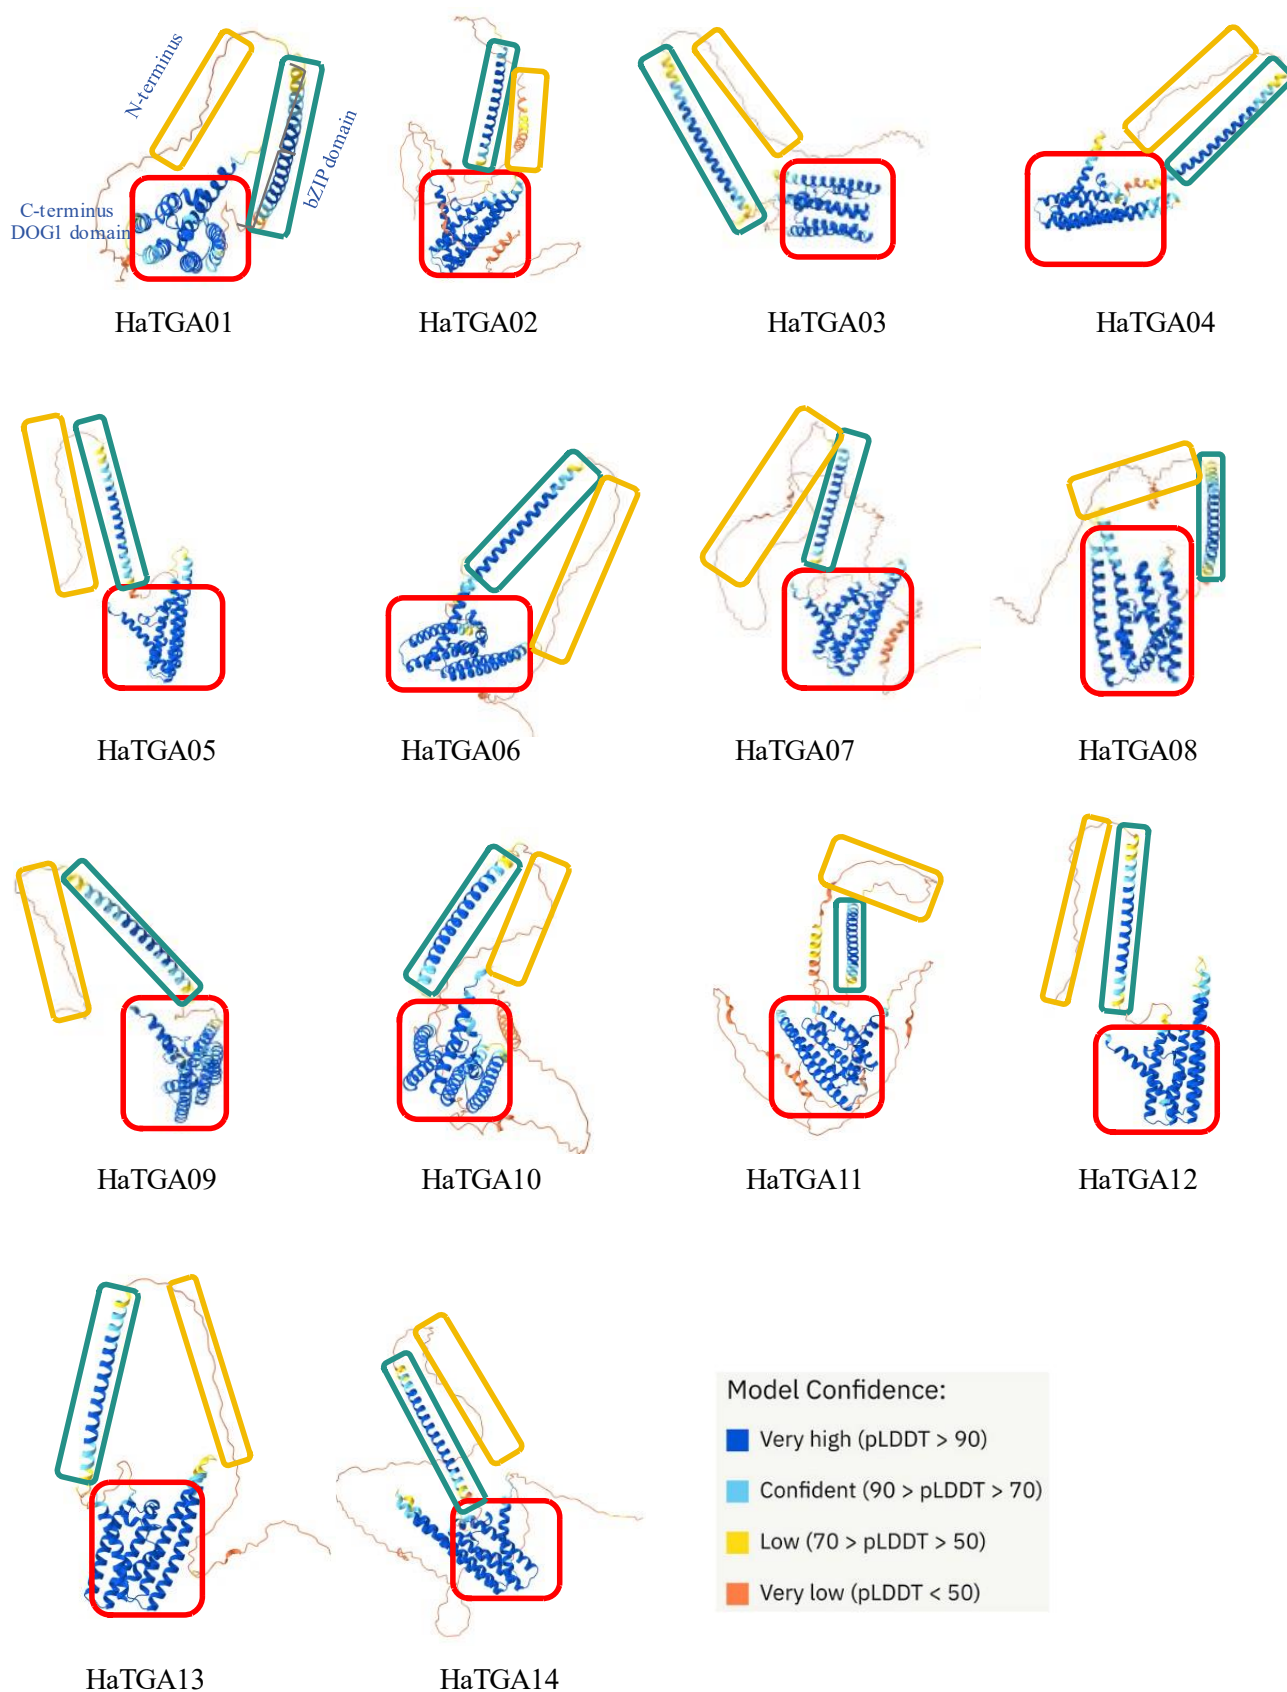

**Figure S3.** In Silico prediction of 3D structures for TGA proteins in sunflower. The predicted tertiary structures of TGA proteins from sunflowers were generated through AlphaFold computational modeling. As a schematic representation of the HaTGA01 domain, showing the flexible N-terminus (yellow dashed box), the bZIP domain (green dashed box), and the C-terminus, encompassing a putative Delay of Germination 1 (DOG1) domain (red dashed box). (pLDDT, AlphaFold per-residue confidence score).



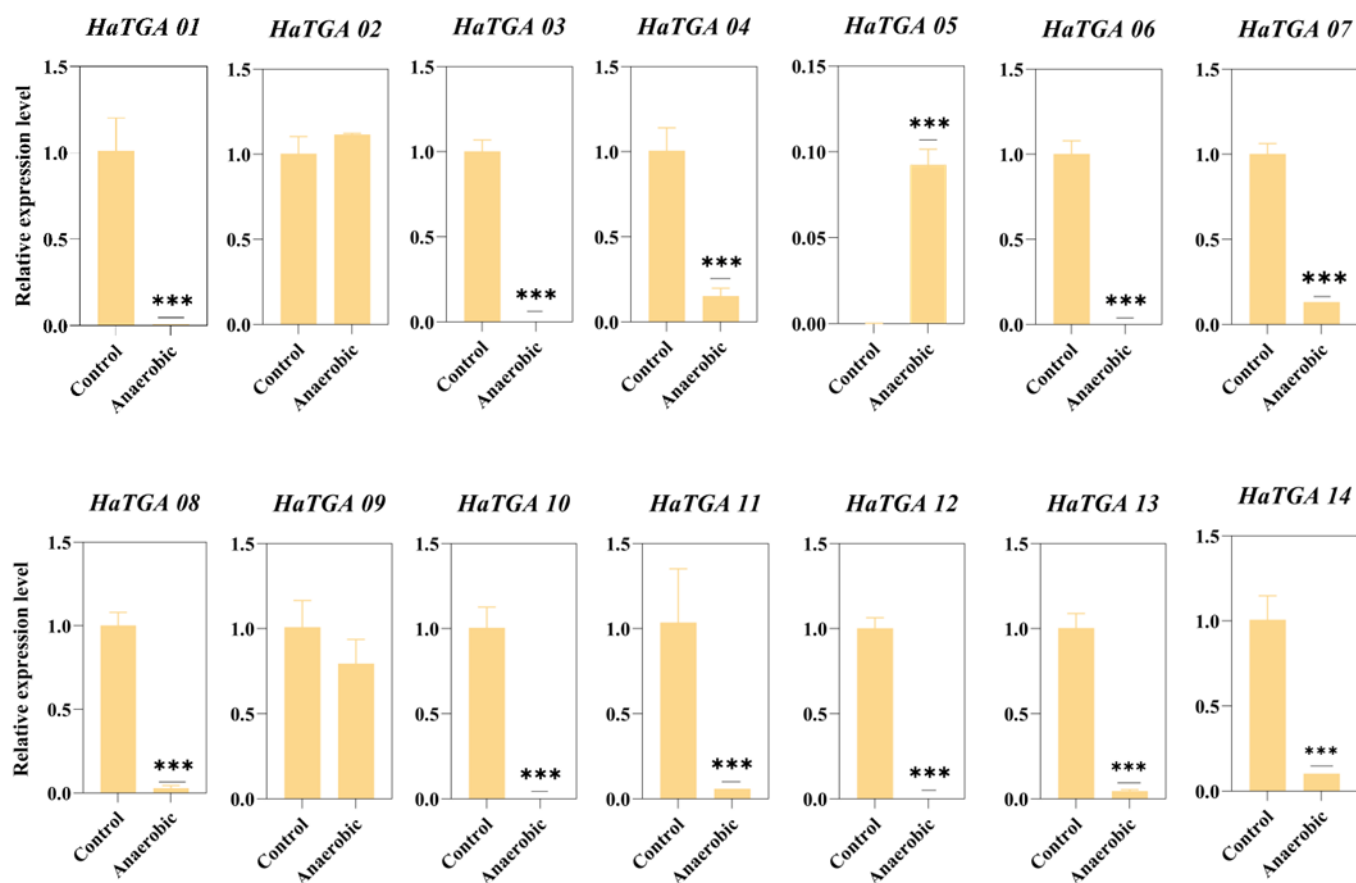

**Figure S4.** Expression profiles of *HaTGA* genes under anaerobic induction. The relative expression levels were calculated using the  $2^{-\Delta\Delta C_t}$  method and compared with that of *HaTublin*, with three replicates. The values represent the means and standard deviations obtained from three biological replicates. The asterisks indicate statistical significance (\*\*\*)  $P < 0.001$  compared to the corresponding control.

**Table S1.** Molecular characteristics of TGA in 13 plant species.

| Gene ID          | Rename  | Number<br>of<br>Amion<br>Acids | MW(Da)   | PI   | Instability<br>Index | Aliphatic<br>Index | Grand<br>Average of<br>Hydropathicity |
|------------------|---------|--------------------------------|----------|------|----------------------|--------------------|---------------------------------------|
| AT5G65210        | AtTGA01 | 368                            | 42063.57 | 7.28 | 37.3                 | 76.63              | -0.524                                |
| AT5G06950        | AtTGA02 | 330                            | 36684.29 | 8.63 | 52.04                | 79.36              | -0.576                                |
| AT1G22070        | AtTGA03 | 384                            | 43755.04 | 5.85 | 59.79                | 76.25              | -0.635                                |
| AT5G10030        | AtTGA04 | 364                            | 41751.28 | 6.68 | 42.57                | 75.6               | -0.557                                |
| AT5G06960        | AtTGA05 | 330                            | 36890.39 | 8.58 | 57.32                | 79.03              | -0.611                                |
| AT3G12250        | AtTGA06 | 355                            | 39716.66 | 8.92 | 54.04                | 79.8               | -0.579                                |
| AT1G77920        | AtTGA07 | 368                            | 41913.06 | 5.97 | 74.16                | 84.35              | -0.605                                |
| AT1G68640        | AtTGA08 | 452                            | 50457.51 | 5.85 | 51.61                | 77.7               | -0.486                                |
| AT1G08320        | AtTGA09 | 481                            | 53514.28 | 7.82 | 64.63                | 76.94              | -0.529                                |
| AT5G06839        | AtTGA10 | 460                            | 51166.56 | 6.7  | 62.94                | 78.96              | -0.564                                |
| Phvul.001G123300 | PvTGA01 | 460                            | 50821.98 | 8.53 | 57.04                | 75.83              | -0.55                                 |
| Phvul.001G249300 | PvTGA02 | 362                            | 40912.63 | 8.41 | 52.91                | 79.06              | -0.457                                |
| Phvul.003G028800 | PvTGA03 | 462                            | 51489.33 | 6.6  | 45.09                | 84.03              | -0.463                                |
| Phvul.007G003600 | PvTGA04 | 444                            | 49112.79 | 6.18 | 56.88                | 76.1               | -0.534                                |
| Phvul.007G025500 | PvTGA05 | 462                            | 51461.47 | 6.03 | 47.79                | 77.29              | -0.493                                |
| Phvul.008G169000 | PvTGA06 | 369                            | 41753.53 | 6.38 | 57.21                | 83.33              | -0.417                                |
| Phvul.009G026900 | PvTGA07 | 351                            | 39724.52 | 6.28 | 50.86                | 94.47              | -0.312                                |
| Phvul.011G203400 | PvTGA08 | 467                            | 51713.7  | 6.13 | 55.14                | 76.55              | -0.586                                |
| ArahyR4ID1P      | AhTGA01 | 503                            | 56631.81 | 6.69 | 64.38                | 68.73              | -0.691                                |
| ArahyLTZY89      | AhTGA02 | 469                            | 52191.43 | 6.4  | 51.96                | 73.28              | -0.564                                |
| ArahyS1DMKE      | AhTGA03 | 469                            | 52191.43 | 6.4  | 51.96                | 73.28              | -0.564                                |
| ArahyRIV6ZB      | AhTGA04 | 368                            | 41626.26 | 8.34 | 55.67                | 76.44              | -0.485                                |
| Arahy0GP62G      | AhTGA05 | 388                            | 43615.67 | 5.84 | 46.31                | 97.81              | -0.248                                |
| Arahy661MCQ      | AhTGA06 | 459                            | 51238.71 | 6.21 | 44.32                | 79.98              | -0.51                                 |
| ArahyKZ9VWQ      | AhTGA07 | 450                            | 49513.54 | 7    | 56.22                | 78.18              | -0.482                                |
| ArahyJ1CFJJ      | AhTGA08 | 487                            | 53623.35 | 7.38 | 50.59                | 72.36              | -0.558                                |
| ArahyRKP385      | AhTGA09 | 331                            | 37018.61 | 8.63 | 58.5                 | 80                 | -0.592                                |
| ArahyW15JJQ      | AhTGA10 | 456                            | 50921.93 | 6.31 | 44.7                 | 79.23              | -0.518                                |
| ArahyP1JBJN      | AhTGA11 | 463                            | 51147.27 | 6.53 | 56.06                | 81.19              | -0.491                                |
| Arahy5F9GBV      | AhTGA12 | 504                            | 56713.86 | 6.56 | 64.22                | 68.79              | -0.692                                |
| ArahyEH3L7F      | AhTGA13 | 531                            | 59169.39 | 6.49 | 55.39                | 73.92              | -0.553                                |
| Arahy6K442L      | AhTGA14 | 368                            | 41586.2  | 8.34 | 56.08                | 76.71              | -0.476                                |
| ArahyH6GQLR      | AhTGA15 | 469                            | 52078.53 | 5.97 | 43.48                | 78.68              | -0.483                                |
| ArahyPHPT4F      | AhTGA16 | 450                            | 49483.51 | 7    | 56.22                | 78.4               | -0.477                                |
| Arahy980X4K      | AhTGA17 | 492                            | 54382.57 | 8.27 | 45.32                | 81.14              | -0.398                                |
| ArahySERN02      | AhTGA18 | 331                            | 37018.61 | 8.63 | 58.02                | 80                 | -0.592                                |
| ArahyK04A4E      | AhTGA19 | 456                            | 50968.95 | 6.34 | 46.34                | 78.38              | -0.541                                |
| ArahyAAI19J      | AhTGA20 | 362                            | 41028.9  | 6.63 | 53.47                | 89.01              | -0.384                                |
| Glyma01G084200   | GmTGA01 | 486                            | 54309.28 | 7.32 | 44.12                | 81.89              | -0.47                                 |
| Glyma02G097900   | GmTGA02 | 467                            | 51853.46 | 7.32 | 42.02                | 85.44              | -0.469                                |
| Glyma02G176800   | GmTGA03 | 484                            | 53927.08 | 7.77 | 60.57                | 76.65              | -0.538                                |
| Glyma03G127600   | GmTGA04 | 460                            | 50928    | 7    | 54.91                | 72.89              | -0.586                                |
| Glyma03G128200   | GmTGA05 | 290                            | 32365.88 | 8.82 | 55.22                | 84.21              | -0.336                                |
| Glyma03G142400   | GmTGA06 | 491                            | 55200.29 | 8.22 | 62.53                | 73.56              | -0.659                                |
| Glyma04G254800   | GmTGA07 | 362                            | 40929    | 8.69 | 49.65                | 94.03              | -0.338                                |
| Glyma05G182500   | GmTGA08 | 370                            | 42096.79 | 7.11 | 41.28                | 81.97              | -0.468                                |
| Glyma06G107300   | GmTGA09 | 355                            | 39984.68 | 6.21 | 55.03                | 96.17              | -0.286                                |
| Glyma08G140100   | GmTGA10 | 379                            | 43105.04 | 7.78 | 42.38                | 83.38              | -0.466                                |
| Glyma10G092100   | GmTGA11 | 517                            | 57921.5  | 6.61 | 65.08                | 74.2               | -0.579                                |
| Glyma10G276100   | GmTGA12 | 456                            | 50993.85 | 6.08 | 51.35                | 75.13              | -0.518                                |
| Glyma10G296200   | GmTGA13 | 332                            | 37141.79 | 8.94 | 56.91                | 82.11              | -0.563                                |
| Glyma11G183700   | GmTGA14 | 493                            | 54385.8  | 5.87 | 55.11                | 76.45              | -0.502                                |
| Glyma11G236300   | GmTGA15 | 364                            | 41178.84 | 6.28 | 56.1                 | 78.08              | -0.464                                |
| Glyma12G088700   | GmTGA16 | 501                            | 55253.16 | 6.61 | 53.46                | 78.1               | -0.463                                |

|                       |         |     |          |      |       |       |        |
|-----------------------|---------|-----|----------|------|-------|-------|--------|
| Glyma12G184500        | GmTGA17 | 488 | 54118.97 | 6.75 | 51.19 | 75.43 | -0.501 |
| Glyma13G085100        | GmTGA18 | 370 | 41915.73 | 7.13 | 58.65 | 85.24 | -0.461 |
| Glyma13G193700        | GmTGA19 | 469 | 51989.98 | 5.98 | 56.7  | 77.65 | -0.587 |
| Glyma13G316900        | GmTGA20 | 490 | 54630.43 | 6.96 | 56.92 | 75.31 | -0.531 |
| Glyma14G167000        | GmTGA21 | 370 | 41888.77 | 8.26 | 58.29 | 84.7  | -0.452 |
| Glyma15G232000        | GmTGA22 | 497 | 55125.35 | 6.1  | 54.95 | 77.24 | -0.639 |
| Glyma18G020900        | GmTGA23 | 362 | 41052.71 | 7.78 | 55.3  | 78.51 | -0.487 |
| Glyma19G130200        | GmTGA24 | 459 | 50717.82 | 8.53 | 54.01 | 75.16 | -0.574 |
| Glyma19G145300        | GmTGA25 | 491 | 55358.4  | 8.71 | 62.05 | 70.59 | -0.715 |
| Glyma20G113600        | GmTGA26 | 455 | 50671.73 | 5.98 | 47.72 | 77.43 | -0.447 |
| Glyma20G246400        | GmTGA27 | 444 | 49505.41 | 5.91 | 59.17 | 80.9  | -0.537 |
| LOC_Os01g17260        | OsTGA01 | 329 | 36837.43 | 7.08 | 57.46 | 78.72 | -0.638 |
| LOC_Os01g59350        | OsTGA02 | 472 | 51326.5  | 6.82 | 46.79 | 80.59 | -0.431 |
| LOC_Os01g64020        | OsTGA03 | 539 | 59538.67 | 6.47 | 61.49 | 73.84 | -0.536 |
| LOC_Os02g10140        | OsTGA04 | 303 | 31720.57 | 9.21 | 57.25 | 73.7  | -0.39  |
| LOC_Os03g20310        | OsTGA05 | 333 | 37069.92 | 8.57 | 56.15 | 85.68 | -0.486 |
| LOC_Os04g54474        | OsTGA06 | 397 | 45091.99 | 5.67 | 49.04 | 78.69 | -0.565 |
| LOC_Os05g37170        | OsTGA07 | 540 | 59423.98 | 5.76 | 62.45 | 75.65 | -0.358 |
| LOC_Os06g15480        | OsTGA08 | 385 | 42332.67 | 6.16 | 54.51 | 79.22 | -0.366 |
| LOC_Os06g41100        | OsTGA09 | 451 | 49272.93 | 8.82 | 56.55 | 76.12 | -0.399 |
| LOC_Os07g48820        | OsTGA10 | 334 | 37215    | 7.14 | 49.66 | 85.42 | -0.495 |
| LOC_Os08g07970        | OsTGA11 | 417 | 45610.51 | 6.39 | 63.47 | 77    | -0.416 |
| LOC_Os09g10840        | OsTGA12 | 475 | 52155.13 | 8.56 | 56.5  | 76.32 | -0.512 |
| LOC_Os09g31390        | OsTGA13 | 523 | 57853.86 | 6.72 | 67.95 | 72.26 | -0.578 |
| LOC_Os11g05480        | OsTGA14 | 430 | 47012.52 | 6.19 | 50.94 | 70    | -0.568 |
| LOC_Os12g05680        | OsTGA15 | 489 | 52859.21 | 6.84 | 52.6  | 72.84 | -0.438 |
| Lsat_1_v5_gn_1_4841   | LsTGA01 | 362 | 41054.64 | 7.78 | 44.67 | 85.25 | -0.471 |
| Lsat_1_v5_gn_2_31440  | LsTGA02 | 330 | 36573.19 | 8.63 | 59.69 | 83.48 | -0.511 |
| Lsat_1_v5_gn_3_59901  | LsTGA03 | 473 | 52435.66 | 6.28 | 45.37 | 74.5  | -0.529 |
| Lsat_1_v5_gn_4_139840 | LsTGA04 | 348 | 39132.43 | 5.63 | 42.04 | 85.34 | -0.442 |
| Lsat_1_v5_gn_5_65440  | LsTGA05 | 332 | 36972.5  | 8.65 | 60.63 | 81.81 | -0.535 |
| Lsat_1_v5_gn_5_157020 | LsTGA06 | 430 | 47645.39 | 8.51 | 62.38 | 74.93 | -0.546 |
| Lsat_1_v5_gn_6_38701  | LsTGA07 | 518 | 57739.51 | 6.79 | 54.49 | 73.46 | -0.604 |
| Lsat_1_v5_gn_6_102001 | LsTGA08 | 326 | 37900.26 | 8.36 | 44.73 | 87.67 | -0.534 |
| Lsat_1_v5_gn_9_27821  | LsTGA09 | 383 | 42502.29 | 8.97 | 66.43 | 81.33 | -0.501 |
| Lsat_1_v5_gn_9_43101  | LsTGA10 | 366 | 41788.69 | 8.71 | 44.83 | 86.69 | -0.459 |
| SIN_1013641           | SiTGA01 | 461 | 50346.52 | 6.4  | 46.75 | 80.63 | -0.407 |
| SIN_1017084           | SiTGA02 | 371 | 41962.53 | 5.84 | 52.47 | 86.66 | -0.427 |
| SIN_1018321           | SiTGA03 | 457 | 50049.16 | 6.81 | 54.96 | 83.46 | -0.417 |
| SIN_1018708           | SiTGA04 | 433 | 47883.39 | 6.85 | 55.26 | 73.58 | -0.599 |
| SIN_1005924           | SiTGA05 | 347 | 38402.35 | 9.4  | 60.18 | 85.62 | -0.49  |
| SIN_1023559           | SiTGA06 | 538 | 59902.27 | 6.8  | 58.04 | 71.51 | -0.577 |
| SIN_1020070           | SiTGA07 | 468 | 51572.68 | 8.52 | 52.14 | 73.25 | -0.555 |
| SIN_1009252           | SiTGA08 | 383 | 43180.21 | 8.94 | 54.74 | 91.78 | -0.333 |
| SIN_1008334           | SiTGA09 | 360 | 41017.72 | 7.16 | 54.46 | 87.31 | -0.497 |
| OIT30766              | NaTGA01 | 372 | 41908.67 | 5.7  | 47.1  | 87.39 | -0.36  |
| OIT05628              | NaTGA02 | 507 | 56322.16 | 6.48 | 59.56 | 73.81 | -0.554 |
| OIT05314              | NaTGA03 | 454 | 49873.74 | 8.53 | 53.24 | 74.45 | -0.578 |
| OIT28278              | NaTGA04 | 325 | 36261.85 | 9.01 | 64.79 | 84.8  | -0.523 |
| OIT03648              | NaTGA05 | 495 | 54223.78 | 6.35 | 46.97 | 79.47 | -0.435 |
| OIT01585              | NaTGA06 | 327 | 36500.22 | 8.96 | 62.73 | 84.25 | -0.513 |
| OIT30028              | NaTGA07 | 501 | 55926.56 | 6.26 | 56.27 | 73.13 | -0.577 |
| OIS99738              | NaTGA08 | 501 | 56249.09 | 6.41 | 67.92 | 75.25 | -0.634 |
| OIT23206              | NaTGA09 | 363 | 41108.1  | 7.1  | 52.02 | 79.59 | -0.382 |
| OIS97611              | NaTGA10 | 373 | 42301.05 | 6.19 | 42.23 | 82.71 | -0.454 |
| OIT04348              | NaTGA11 | 514 | 57849.94 | 6.51 | 64.94 | 69.73 | -0.678 |
| OIS95689              | NaTGA12 | 363 | 41240.01 | 7.02 | 54.16 | 75.84 | -0.485 |
| Sb010G110100          | SbTGA01 | 462 | 50093.64 | 6.34 | 53.46 | 81.6  | -0.21  |
| Sb003G329500          | SbTGA02 | 468 | 51130.35 | 6.39 | 55.59 | 77.5  | -0.498 |
| Sb003G081000          | SbTGA03 | 330 | 36580.06 | 7.88 | 57.45 | 79.64 | -0.583 |

|                       |         |     |           |      |       |       |        |
|-----------------------|---------|-----|-----------|------|-------|-------|--------|
| Sb009G180700          | SbTGA04 | 332 | 36982.68  | 6.34 | 58.95 | 84.22 | -0.519 |
| Zm00001d037317        | ZmTGA01 | 432 | 46925.11  | 6.95 | 56.6  | 77.62 | -0.268 |
| Zm00001d043153        | ZmTGA02 | 422 | 45869.22  | 5.91 | 49.9  | 71.78 | -0.5   |
| Zm00001d010658        | ZmTGA03 | 345 | 38042.98  | 7.16 | 51.58 | 83.57 | -0.508 |
| Zm00001d012553        | ZmTGA04 | 470 | 50719     | 6.34 | 46.71 | 77.79 | -0.403 |
| Zm00001d008225        | ZmTGA05 | 420 | 46995.43  | 9.25 | 57.19 | 87.17 | -0.416 |
| Ca09600               | CaTGA01 | 363 | 41395.08  | 5.48 | 55.68 | 87.38 | -0.368 |
| Ca11168               | CaTGA02 | 356 | 40261.81  | 6.17 | 51.66 | 89.35 | -0.377 |
| Ca17971               | CaTGA03 | 470 | 52026.14  | 6.29 | 52.93 | 79.55 | -0.55  |
| Ca25784               | CaTGA04 | 475 | 56352.258 | 6.19 | 42.48 | 82.38 | -0.453 |
| Ca10901               | CaTGA05 | 332 | 37207.91  | 8.63 | 61.43 | 80.66 | -0.56  |
| Ca05471               | CaTGA06 | 373 | 41878.89  | 6.01 | 48.93 | 81.9  | -0.458 |
| Ca07170               | CaTGA07 | 458 | 50956.13  | 7.85 | 57.94 | 74.24 | -0.618 |
| Ca12670               | CaTGA08 | 384 | 43490.52  | 6.68 | 56.53 | 80.86 | -0.447 |
| VIT_01s0011g03230.t01 | VvTGA01 | 349 | 39125.45  | 5.97 | 44.05 | 85.9  | -0.375 |
| VIT_06s0080g00360.t01 | VvTGA02 | 361 | 41021.15  | 6.61 | 51.79 | 76.29 | -0.592 |
| VIT_07s0031g01320.t01 | VvTGA03 | 469 | 51594.52  | 6.05 | 55.26 | 76.23 | -0.535 |
| VIT_08s0007g05170.t01 | VvTGA04 | 451 | 49909.81  | 7.85 | 59.05 | 74.92 | -0.576 |
| VIT_08s0007g06160.t01 | VvTGA05 | 423 | 46222.72  | 5.28 | 37.43 | 75.67 | -0.356 |
| VIT_13s0084g00660.t01 | VvTGA06 | 491 | 54643.93  | 6.64 | 61.47 | 75.4  | -0.549 |
| VIT_18s0001g04470.t01 | VvTGA07 | 500 | 54948.8   | 6.45 | 52.59 | 75.42 | -0.459 |

---

Table S2. Genomic collinearity of TGA genes between sunflower and other species.

| Chromosomal<br>information<br>of<br>other species | The corresponding<br>TGA gene | collinearity | Sunflower<br>chromosome<br>information | HaTGA          |
|---------------------------------------------------|-------------------------------|--------------|----------------------------------------|----------------|
| Gm-11                                             | <i>GmTGA14</i>                | ==           | Ha-2                                   | <i>HaTGA02</i> |
| Gm-12                                             | <i>GmTGA17</i>                | ==           | Ha-2                                   | <i>HaTGA02</i> |
| Gm-12                                             | <i>GmTGA16</i>                | ==           | Ha-2                                   | <i>HaTGA02</i> |
| Gm-13                                             | <i>GmTGA20</i>                | ==           | Ha-2                                   | <i>HaTGA02</i> |
| Gm-6                                              | <i>GmTGA09</i>                | ==           | Ha-2                                   | <i>HaTGA01</i> |
| Gm-6                                              | <i>GmTGA09</i>                | ==           | Ha-4                                   | <i>HaTGA03</i> |
| Gm-13                                             | <i>GmTGA18</i>                | ==           | Ha-5                                   | <i>HaTGA04</i> |
| Gm-6                                              | <i>GmTGA09</i>                | ==           | Ha-5                                   | <i>HaTGA04</i> |
| Gm-10                                             | <i>GmTGA11</i>                | ==           | Ha-10                                  | <i>HaTGA07</i> |
| Gm-19                                             | <i>GmTGA25</i>                | ==           | Ha-10                                  | <i>HaTGA07</i> |
| Gm-2                                              | <i>GmTGA03</i>                | ==           | Ha-10                                  | <i>HaTGA07</i> |
| Gm-3                                              | <i>GmTGA06</i>                | ==           | Ha-10                                  | <i>HaTGA07</i> |
| Gm-8                                              | <i>GmTGA10</i>                | ==           | Ha-11                                  | <i>HaTGA08</i> |
| Gm-11                                             | <i>GmTGA14</i>                | ==           | Ha-13                                  | <i>HaTGA11</i> |
| Gm-12                                             | <i>GmTGA16</i>                | ==           | Ha-13                                  | <i>HaTGA11</i> |
| Gm-12                                             | <i>GmTGA17</i>                | ==           | Ha-13                                  | <i>HaTGA11</i> |
| Gm-13                                             | <i>GmTGA20</i>                | ==           | Ha-13                                  | <i>HaTGA11</i> |
| Gm-19                                             | <i>GmTGA24</i>                | ==           | Ha-13                                  | <i>HaTGA10</i> |
| Gm-1                                              | <i>GmTGA01</i>                | ==           | Ha-17                                  | <i>HaTGA14</i> |
| Gm-10                                             | <i>GmTGA12</i>                | ==           | Ha-17                                  | <i>HaTGA14</i> |
| Gm-2                                              | <i>GmTGA02</i>                | ==           | Ha-17                                  | <i>HaTGA14</i> |
| Gm-20                                             | <i>GmTGA26</i>                | ==           | Ha-17                                  | <i>HaTGA14</i> |
| Ah-2                                              | <i>AhTGA02</i>                | ==           | Ha-2                                   | <i>HaTGA02</i> |
| Ah-7                                              | <i>AhTGA07</i>                | ==           | Ha-2                                   | <i>HaTGA02</i> |
| Ah-7                                              | <i>AhTGA08</i>                | ==           | Ha-2                                   | <i>HaTGA01</i> |
| Ah-12                                             | <i>AhTGA12</i>                | ==           | Ha-2                                   | <i>HaTGA02</i> |
| Ah-16                                             | <i>AhTGA16</i>                | ==           | Ha-2                                   | <i>HaTGA01</i> |
| Ah-17                                             | <i>AhTGA17</i>                | ==           | Ha-2                                   | <i>HaTGA02</i> |
| Ah-7                                              | <i>AhTGA08</i>                | ==           | Ha-5                                   | <i>HaTGA04</i> |
| Ah-16                                             | <i>AhTGA16</i>                | ==           | Ha-5                                   | <i>HaTGA04</i> |
| Ah-1                                              | <i>AhTGA01</i>                | ==           | Ha-10                                  | <i>HaTGA07</i> |
| Ah-5                                              | <i>AhTGA06</i>                | ==           | Ha-10                                  | <i>HaTGA07</i> |
| Ah-11                                             | <i>AhTGA10</i>                | ==           | Ha-10                                  | <i>HaTGA07</i> |
| Ah-15                                             | <i>AhTGA15</i>                | ==           | Ha-10                                  | <i>HaTGA07</i> |
| Ah-2                                              | <i>AhTGA02</i>                | ==           | Ha-13                                  | <i>HaTGA11</i> |
| Ah-7                                              | <i>AhTGA06</i>                | ==           | Ha-13                                  | <i>HaTGA11</i> |
| Ah-12                                             | <i>AhTGA10</i>                | ==           | Ha-13                                  | <i>HaTGA11</i> |
| Ah-17                                             | <i>AhTGA15</i>                | ==           | Ha-13                                  | <i>HaTGA11</i> |
| Ah-4                                              | <i>AhTGA06</i>                | ==           | Ha-17                                  | <i>HaTGA14</i> |
| Ah-8                                              | <i>AhTGA10</i>                | ==           | Ha-17                                  | <i>HaTGA14</i> |
| Ah-18                                             | <i>AhTGA15</i>                | ==           | Ha-17                                  | <i>HaTGA14</i> |
| Ls-1                                              | <i>LsTGA01</i>                | ==           | Ha-2                                   | <i>HaTGA01</i> |
| Ls-6                                              | <i>LsTGA07</i>                | ==           | Ha-2                                   | <i>HaTGA02</i> |
| Ls-9                                              | <i>LsTGA10</i>                | ==           | Ha-2                                   | <i>HaTGA01</i> |
| Ls-1                                              | <i>LsTGA01</i>                | ==           | Ha-4                                   | <i>HaTGA03</i> |
| Ls-9                                              | <i>LsTGA10</i>                | ==           | Ha-4                                   | <i>HaTGA03</i> |
| Ls-1                                              | <i>LsTGA01</i>                | ==           | Ha-5                                   | <i>HaTGA04</i> |
| Ls-6                                              | <i>LsTGA08</i>                | ==           | Ha-5                                   | <i>HaTGA04</i> |
| Ls-9                                              | <i>LsTGA10</i>                | ==           | Ha-5                                   | <i>HaTGA04</i> |
| Ls-2                                              | <i>LsTGA02</i>                | ==           | Ha-6                                   | <i>HaTGA05</i> |
| Ls-4                                              | <i>LsTGA04</i>                | ==           | Ha-9                                   | <i>HaTGA06</i> |
| Ls-9                                              | <i>LsTGA09</i>                | ==           | Ha-10                                  | <i>HaTGA07</i> |
| Ls-1                                              | <i>LsTGA01</i>                | ==           | Ha-11                                  | <i>HaTGA08</i> |



|       |                |    |       |                |
|-------|----------------|----|-------|----------------|
| Ls-9  | <i>LsTGA10</i> | == | Ha-11 | <i>HaTGA08</i> |
| Ls-5  | <i>LsTGA05</i> | == | Ha-12 | <i>HaTGA09</i> |
| Ls-5  | <i>LsTGA06</i> | == | Ha-13 | <i>HaTGA10</i> |
| Ls-6  | <i>LsTGA07</i> | == | Ha-13 | <i>HaTGA11</i> |
| Ls-4  | <i>LsTGA04</i> | == | Ha-15 | <i>HaTGA13</i> |
| Ls-3  | <i>LsTGA03</i> | == | Ha-17 | <i>HaTGA14</i> |
| Si-9  | <i>SiTGA09</i> | == | Ha-2  | <i>HaTGA02</i> |
| Si-4  | <i>SiTGA05</i> | == | Ha-10 | <i>HaTGA07</i> |
| Si-5  | <i>SiTGA06</i> | == | Ha-10 | <i>HaTGA07</i> |
| Si-4  | <i>SiTGA04</i> | == | Ha-13 | <i>HaTGA10</i> |
| Si-9  | <i>SiTGA09</i> | == | Ha-13 | <i>HaTGA11</i> |
| Si-1  | <i>SiTGA01</i> | == | Ha-17 | <i>HaTGA14</i> |
| Si-2  | <i>SiTGA03</i> | == | Ha-17 | <i>HaTGA14</i> |
| Ca-1  | <i>CaTGA02</i> | == | Ha-2  | <i>HaTGA02</i> |
| Ca-6  | <i>CaTGA01</i> | == | Ha-2  | <i>HaTGA02</i> |
| Ca-3  | <i>CaTGA07</i> | == | Ha-10 | <i>HaTGA07</i> |
| Ca-4  | <i>CaTGA06</i> | == | Ha-10 | <i>HaTGA07</i> |
| Ca-1  | <i>CaTGA02</i> | == | Ha-13 | <i>HaTGA11</i> |
| Ca-6  | <i>CaTGA01</i> | == | Ha-13 | <i>HaTGA11</i> |
| Ca-4  | <i>CaTGA05</i> | == | Ha-17 | <i>HaTGA14</i> |
| Vv-18 | <i>VvTGA07</i> | == | Ha-2  | <i>HaTGA01</i> |
| Vv-6  | <i>VvTGA02</i> | == | Ha-2  | <i>HaTGA02</i> |
| Vv-8  | <i>VvTGA04</i> | == | Ha-10 | <i>HaTGA07</i> |
| Vv-18 | <i>VvTGA07</i> | == | Ha-11 | <i>HaTGA08</i> |
| Vv-6  | <i>VvTGA02</i> | == | Ha-13 | <i>HaTGA11</i> |
| Vv-1  | <i>VvTGA01</i> | == | Ha-17 | <i>HaTGA14</i> |
| At-1  | <i>AtTGA03</i> | == | Ha-5  | <i>HaTGA04</i> |
| At-5  | <i>AtTGA10</i> | == | Ha-10 | <i>HaTGA07</i> |
| At-1  | <i>AtTGA09</i> | == | Ha-13 | <i>HaTGA11</i> |
| At-1  | <i>AtTGA08</i> | == | Ha-17 | <i>HaTGA14</i> |
| Sb-3  | <i>SbTGA02</i> | == | Ha-2  | <i>HaTGA02</i> |
| Sb-10 | <i>SbTGA01</i> | == | Ha-10 | <i>HaTGA07</i> |
| Sb-3  | <i>SbTGA02</i> | == | Ha-13 | <i>HaTGA11</i> |
| Sb-9  | <i>SbTGA04</i> | == | Ha-13 | <i>HaTGA11</i> |
| Zm-3  | <i>ZmTGA02</i> | == | Ha-2  | <i>HaTGA02</i> |

**Table S3.** qRT-PCR primer sequence information.

| Primer name      | Primer sequence (5'-3') |
|------------------|-------------------------|
| HaTublin-qRCCR-F | CTGATTGTCTCGTAAACGCTTG  |
| HaTublin-qRCCR-R | CTCAAGATCAGCAACAGTGC    |
| HaTGA01-qPCR-F   | CCAGTGGCTTGAGGACC       |
| HaTGA01-qPCR-R   | TGCATCCTCGGCTTGTCG      |
| HaTGA02-qPCR-F   | TATGGCGGTTGCGCTAGG      |
| HaTGA02-qPCR-R   | TCGCTGCTTGTCGAACCG      |
| HaTGA03-qPCR-F   | GCTTGGAGGACCACGACC      |
| HaTGA03-qPCR-R   | CCTCGGCTTGTTTGCACG      |
| HaTGA04-qPCR-F   | CGGATGCTGCGAAAACCG      |
| HaTGA04-qPCR-R   | TGATGGTCGAAACCCGCC      |
| HaTGA05-qPCR-F   | TGTCGCAGGGCATGGAAG      |

---

|                |                       |
|----------------|-----------------------|
| HaTGA05-qPCR-R | GCTACGTTGCCCCGACGAA   |
| HaTGA06-qPCR-F | GGCGTACGTCCAGCAGTT    |
| HaTGA06-qPCR-R | AGCATTGACCCCACCACG    |
| HaTGA07-qPCR-F | ATGGCGATGGGCCTTATGAT  |
| HaTGA07-qPCR-R | ACTCGAACCCTCTCCAGTAGT |
| HaTGA08-qPCR-F | GCATGTGGGAGGATGCGT    |
| HaTGA08-qPCR-R | TTTTGTTGCCGCAGCGTC    |
| HaTGA09-qPCR-F | CTCAGCAGGCAGAGGACG    |
| HaTGA09-qPCR-R | GGACCAATGGAGCCTGCT    |
| HaTGA10-qPCR-F | ACTTGGAACCGCTGACCG    |
| HaTGA10-qPCR-R | CCACGGGTGCATCTCTGG    |
| HaTGA11-qPCR-F | GCCGAGCTGCGTAAAGGA    |
| HaTGA11-qPCR-R | ACGTCGGATTTGGCTGCA    |
| HaTGA12-qPCR-F | CTCGGCAGCAAGGCATCT    |
| HaTGA12-qPCR-R | TGTGTTCGTCCAGCCACC    |
| HaTGA13-qPCR-F | CAAGCATGCCAGCAAGCC    |
| HaTGA13-qPCR-R | ACCGCCACCCAACCTTTG    |
| HaTGA14-qPCR-F | ACTGAGGCAGCAAACGCT    |
| HaTGA14-qPCR-R | GGCGCGCTAACCACAATG    |

---
